# Supplementary material
Source: HighWire-hosted journal article supplement (https://erj.ersjournals.com/content/57/4/2002693)
Supplement: inline-supplementary-material-1 [file inline-supplementary-material-1.pdf]

## **Online Supplement**

### **A genome-wide association study of severe asthma exacerbations in Latino children and adolescents**

Qi Yan, PhD<sup>1#</sup>, Erick Forno, MD, MPH<sup>1#</sup>, Esther Herrera-Luis, PhD<sup>2#</sup>, Maria Pino-Yanes, PhD<sup>2,3</sup>, Cancan Qi, MsC<sup>4,5</sup>, Raimon Rios, MSc<sup>6</sup>, Yueh-Ying Han, PhD<sup>1</sup>, Soyeon Kim, PhD<sup>1</sup>, Sam Oh, PhD<sup>7</sup>, Edna Acosta-Pérez, PhD<sup>8</sup>, Rong Zhang, PhD<sup>1</sup>, Donglei Hu, PhD<sup>7</sup>, Celeste Eng<sup>7</sup>, Scott Huntsman, MS<sup>7</sup>, Lydiana Avila, MD<sup>9</sup>, Nadia Boutaoui, PhD<sup>1</sup>, Michelle M. Cloutier, MD<sup>10</sup>, Manuel E. Soto-Quiros, MD, PhD<sup>9</sup>, Cheng-jian Xu, PhD<sup>11,12</sup>, Scott T. Weiss, MD, MS<sup>13</sup>, Jessica Lasky-Su, DSc<sup>13</sup>, Megan R. Kiedrowski<sup>14</sup>, Camila Figueiredo, PhD<sup>6</sup>, Jennifer Bomberger, PhD<sup>14</sup>, Mauricio L. Barreto, MD, PhD<sup>15</sup>, Glorisa Canino, PhD<sup>8</sup>, Wei Chen, PhD<sup>1</sup>, Gerard H. Koppelman, MD PhD<sup>4,5</sup>, Esteban G. Burchard, MD, MPH<sup>7^</sup>, Juan C. Celedón, MD, DrPH, ATSF<sup>1^</sup>

<sup>1</sup>*Division of Pediatric Pulmonary Medicine, UPMC Children's Hospital of Pittsburgh, University of Pittsburgh, Pittsburgh, PA, USA.* <sup>2</sup>*Genomics and Health Group, Department of Biochemistry, Microbiology, Cell Biology and Genetics, Universidad de La Laguna, La Laguna, Santa Cruz de Tenerife, Spain.* <sup>3</sup>*CIBER de Enfermedades Respiratorias, Instituto de Salud Carlos III, Madrid, Spain.* <sup>4</sup>*University of Groningen, University Medical Center Groningen, Dept. of Pediatric Pulmonology and Pediatric Allergy, Beatrix Children's Hospital, and* <sup>5</sup>*University of Groningen, University Medical Center Groningen, GRIAC Research Institute, Groningen, The Netherlands.* <sup>6</sup>*Instituto de Ciências da Saúde, Universidade Federal da Bahia, Vale do Canela, Salvador, Bahia, Brazil.* <sup>7</sup>*Department of Medicine, University of California San Francisco, San Francisco, CA, USA.* <sup>8</sup>*Behavioral Sciences Research Institute, University of Puerto Rico, San Juan, Puerto Rico.* <sup>9</sup>*Department of Pediatrics, Hospital Nacional de Niños, San José, Costa Rica.* <sup>10</sup>*Department of Pediatrics, University of Connecticut, Farmington, CT, USA.* <sup>11</sup>*CiiM and TWINCORE, joint ventures between the Hannover Medical School and the Helmholtz Centre for Infection Research,*

Hannover, Germany. <sup>12</sup>Department of Internal Medicine and Radboud Center for Infectious Diseases, Radboud University Medical Center, Nijmegen, the Netherlands. <sup>13</sup>Channing Division of Network Medicine, Brigham and Women's Hospital, Harvard Medical School, Boston, MA, USA. <sup>14</sup>Department of Microbiology and Molecular Genetics, University of Pittsburgh, Pittsburgh, PA, USA. <sup>15</sup>Instituto de Saúde Coletiva, Federal University of Bahia, Salvador, Brazil.

#Shared first authors. ^Shared senior authors.

**\*Corresponding author:** Juan C. Celedón, MD, DrPH, ATSF  
Division of Pulmonary Medicine  
UPMC Children's Hospital of Pittsburgh  
4401 Penn Avenue, Pittsburgh, PA 15224  
Phone: 412.692.8429; Fax 412.692.7636;  
Email: [juan.celedon@chp.edu](mailto:juan.celedon@chp.edu)

## **METHODS**

### **Study populations included in the meta-analysis of GWAS of severe exacerbations**

Hartford-Puerto Rico study (HPR): From September 2003 to June 2010, children with and without asthma were recruited in Hartford, (CT) and San Juan (PR), as reported elsewhere [1]; only children with asthma (n=618) were considered for the current analysis. All participants were 6 to 14 years old and had four Puerto Rican grandparents, and asthma was defined as physician-diagnosed asthma and  $\geq 1$  episode of wheeze in the prior year. Genome-wide genotyping was conducted using the HumanOmni2.5 BeadChip platform (Illumina Inc., San Diego, CA), as previously described [2]. Genotype imputation was performed with the Michigan Imputation Server [3], using the Haplotype Reference Consortium (HRC) r1.1 2016 [4] as the reference panel. Genotyped or imputed SNPs with imputation quality  $r^2 < 0.3$  or Hardy-Weinberg equilibrium (HWE)  $P < 1 \times 10^{-4}$  or minor allele frequency MAF  $< 0.05$  were excluded from the analysis. Written parental consent was obtained for participating children, from whom written assent was also obtained. The study was approved by the Institutional Review Boards of the University of Puerto Rico (San Juan, PR), Brigham and Women's Hospital (Boston, MA) and the University of Pittsburgh (Pittsburgh, PA).

The Genetics of Asthma in Latino Americans study (GALA II): Subjects were recruited using a combination of community and clinic-based approaches from centers throughout the U.S. (Chicago [IL], Bronx [NY], Houston [TX], San Francisco Bay Area [CA] and Puerto Rico). Subjects were eligible if they were aged 8 to 21 years, had  $< 10$  pack-years of smoking history and were not current smokers, and had four grandparents of Hispanic or Latino ethnicity. Asthma was defined based on a physician's diagnosis and self-reported symptoms and medication use for asthma within the last two years. Genotyping was conducted with the Axiom<sup>®</sup> LAT1 array (World Array 4, Affymetrix, Santa Clara, CA), and QC was performed as previously described [5].

Imputation was performed using the Michigan Imputation Server [3], using HRC r1.1 2016 [4] as reference, and only SNPs with MAF  $\geq 0.05$  and imputation quality  $r^2 \geq 0.3$  were kept. The study was approved by the Institutional Review Boards of UCSF and at each participating center. All subjects and their parents provided written informed assent and written informed consent, respectively.

*The Genetics of Asthma in Costa Rica Study (GACRS):* Subject recruitment and study procedures in the GACRS have been described elsewhere [6, 7]. In brief, Costa Rican children ages 6 to 14 years were recruited from February 2001 to July 2011. Children were included in the study if they had asthma (defined as physician-diagnosed asthma and at least two respiratory symptoms [wheezing, cough, or dyspnea] or a history of asthma attacks in the previous year) and a high probability of having at least 6 great-grandparents born in the Central Valley of Costa Rica. Genome-wide genotyping was conducted using the HumanOmniExpress-12v1\_A chip [6]. Genotype imputation was performed with the Michigan Imputation Server [3], using the Haplotype Reference Consortium (HRC) r1.1 2016 [4] as the reference panel, with QC measures as in the HPR study. In addition, since the original data were for nuclear families, SNPs with Mendelian error rate  $\geq 0.01$  were excluded from the analysis. The study was approved by the Institutional Review Boards of the Hospital Nacional de Niños (San Jose, Costa Rica) and Brigham and Women's Hospital (Boston, Mass).

*The Social Changes, Asthma and Allergy in Latin America study (SCAALA) – Bahia, Brazil:* Children ages 5 to 12 years were recruited in 2005. Subject recruitment and the study protocol have been described in detail [8]. Genotyping was carried out using the Illumina HumanOmni2.5-8v1 Kit BeadChip (Illumina, San Diego, CA) platform. QC measures for the genotypic data were similar to those in the HPR study. Written informed consent was obtained from the legal guardian

of each subject. The study was approved by the ethics committees at the Federal University of Bahia and National Council for Ethics in Research.

### **Study populations included in molecular quantitative trait analyses in nasal epithelium**

*The Epigenetic Variation and childhood Asthma in Puerto Rico study (EVA-PR)*: In EVA-PR, children with and without asthma (aged 9-20 years) were recruited in San Juan (PR) from February 2014 to May 2017, using a similar approach to that used in the HPR study [9]. DNA and RNA were extracted from nasal specimens collected from the inferior turbinate, as reported elsewhere [9]. For whole-genome methylation QC, the R package *ENmix* was used to filter CpG probes with obvious multimodal distributions [10]. Cross-reactive and SNP-containing probes [11], sex chromosomal probes, and low-quality probes (>10% of samples with detection p-values >0.01) were removed. We further removed CpG probes with mean  $\beta$ -value <0.1 or >0.9 [12]. Methylation  $\beta$ -values were calculated as a percentage:  $\beta = M / (M + U + \alpha)$ , where M and U represent methylated and unmethylated signal intensities, respectively, and  $\alpha$  is an arbitrary offset to stabilize  $\beta$ -values where fluorescent intensities are low.  $\beta$ -values were then transformed to M-values as  $\log_2(\beta / (1 - \beta))$ . For RNA-Seq QC, FastQC was used to check read quality in raw fastq files [13]. Low quality reads and 3' adapters were trimmed with Trim Galore! and Cutadapt [14, 15]. Saved reads were aligned to reference human genome (hg19) with STAR [16] and TPM (Transcripts Per Kilobase Million) was used as proxy for gene expression level. Samples with low alignment percentage were removed from downstream analyses. Furthermore, low expressed genes with mean TPM <0.5 were removed. The study was approved by the institutional review boards of the University of Puerto Rico (San Juan, PR) and the University of Pittsburgh (Pittsburgh, PA). Written parental consent and assent were obtained from participants <18 years old, and consent was obtained from participants  $\geq 18$  years old.

PIAMA: Details of the study design and protocol have been previously published [17, 18]. The Medical Ethical Committees of the participating institutes approved the study, and the parents and legal guardians of all participants, as well as the participants themselves, gave written informed consent. At the age of 16 years, nasal epithelial cells were collected at two study centers (Groningen and Utrecht) [19] by brushing the lateral area underneath the right inferior turbinate. DNA methylation data were pre-processed with Bioconductor package *minfi* [20], using the original IDAT files from the HiScanSQ scanner. Samples with call rate <99% were removed. 65 SNP probes were used to check for concordance between paired DNA samples (nasal and blood DNA samples from the same subjects were hybridized in the same experiments); paired samples with Pearson correlation coefficient <0.9 were excluded, as were probes on sex chromosomes, probes that mapped to multiple loci, 65 SNP-probes, and probes containing SNPs at the target CpG sites with a MAF>0.05 [11]. “DASEN” [21] was used to perform signal correction and normalization. After QC, 455 samples and 436 824 probes remained, and 432 samples had matched genotype data.

### Meta-analysis of GWAS of SAEs

METAL [22] takes  $P$ -values across independent studies as input, with MAF, sample size and effect direction considered. After the test allele was determined, a Z-score was calculated in each study:

$$Z_i = \Phi^{-1} \left( 1 - P_i/2 \right) \times \text{sign}(\Delta_i),$$

where  $Z_i$  is the Z-score for study  $i$ ,  $P_i$  is the  $P$ -value for study  $i$ ,  $\Delta_i$  is the direction of effect for study  $i$ , and  $\Phi^{-1}$  gives the percentile of a standard normal distribution. Then, the meta Z-score and  $P$ -value can be calculated,

$$Z = \frac{\sum_i Z_i w_i}{\sqrt{\sum_i w_i^2}}, \quad P = 2\Phi(|-Z|)$$

where  $Z$  is the meta Z-score,  $P$  is the meta  $P$ -value, and  $w_i$  is the weight for study  $i$ ,

$$w_i = \frac{MAF_i(1 - MAF_i)N_i^{cas}N_i^{con}}{(N_i^{cas} + N_i^{con})}$$

where  $MAF_i$  is the minor allele frequency for study  $i$ ,  $N_i^{cas}$  is the number of cases for study  $i$  and  $N_i^{con}$  is the number of controls for study  $i$ . This weighting is intended to assign larger weights to studies with larger sample size, more balanced case-control numbers and higher MAF [23]. Summary odds ratios (ORs) were calculated by averaging the study-specific log-odds ratios, with weights reflecting the standard errors from the study-specific ORs. Specifically,

$$OR = \exp\left(\sum_i \frac{\log(OR_i)}{(SE_i)^2} / \sum_i \frac{1}{(SE_i)^2}\right)$$

where  $SE_i$  is the standard error of  $\log(OR)$  for study  $i$ .

### Higgin's & Thompson's $I^2$

We first need to calculate Cochran's  $Q$ -statistic, which is calculated as the weighted sum of squared differences between individual study effects and the pooled effect across studies, with the weights being those used in the pooling method.

$$Q = \sum_i \frac{1}{(SE_i)^2} \left( \log(OR_i) - \sum_i \frac{\log(OR_i)}{(SE_i)^2} / \sum_i \frac{1}{(SE_i)^2} \right)^2$$

where  $SE_i$  is the standard error of  $\log(OR)$  for study  $i$ . We then calculated  $I^2$  by using

$$I^2 = \max\left\{0, \frac{Q - (K - 1)}{Q}\right\}$$

where  $K$  is the number of studies, which is 4.

### REFERENCES

1. Brehm JM, Acosta-Perez E, Klei L, *et al.* African ancestry and lung function in Puerto Rican children. *J Allergy Clin Immunol* 2012; 129(6): 1484-1490 e1486.
2. Brehm JM, Acosta-Perez E, Klei L, *et al.* Vitamin D insufficiency and severe asthma exacerbations in Puerto Rican children. *Am J Respir Crit Care Med* 2012; 186(2): 140-146.
3. Das S, Forer L, Schonherr S, *et al.* Next-generation genotype imputation service and methods. *Nat Genet* 2016; 48(10): 1284-1287.

4. McCarthy S, Das S, Kretzschmar W, *et al.* A reference panel of 64,976 haplotypes for genotype imputation. *Nat Genet* 2016: 48(10): 1279-1283.
5. Pino-Yanes M, Thakur N, Gignoux CR, *et al.* Genetic ancestry influences asthma susceptibility and lung function among Latinos. *J Allergy Clin Immunol* 2015: 135(1): 228-235.
6. Hunninghake GM, Soto-Quiros ME, Avila L, *et al.* Polymorphisms in IL13, total IgE, eosinophilia, and asthma exacerbations in childhood. *J Allergy Clin Immunol* 2007: 120(1): 84-90.
7. Hunninghake GM, Soto-Quiros ME, Avila L, *et al.* Sensitization to *Ascaris lumbricoides* and severity of childhood asthma in Costa Rica. *J Allergy Clin Immunol* 2007: 119(3): 654-661.
8. Barreto ML, Cunha SS, Alcantara-Neves N, *et al.* Risk factors and immunological pathways for asthma and other allergic diseases in children: background and methodology of a longitudinal study in a large urban center in Northeastern Brazil (Salvador-SCAALA study). *BMC Pulm Med* 2006: 6: 15.
9. Forno E, Wang T, Qi C, *et al.* DNA methylation in nasal epithelium, atopy, and atopic asthma in children: a genome-wide study. *Lancet Respir Med* 2019: 7(4): 336-346.
10. Xu Z, Niu L, Li L, *et al.* ENmix: a novel background correction method for Illumina HumanMethylation450 BeadChip. *Nucleic Acids Res* 2016: 44(3): e20.
11. Chen YA, Lemire M, Choufani S, *et al.* Discovery of cross-reactive probes and polymorphic CpGs in the Illumina Infinium HumanMethylation450 microarray. *Epigenetics* 2013: 8(2): 203-209.
12. Chen W, Wang T, Pino-Yanes M, *et al.* An epigenome-wide association study of total serum IgE in Hispanic children. *J Allergy Clin Immunol* 2017: 140(2): 571-577.
13. Bioinformatics B. FastQC A quality control tool for high throughput sequence data. Cambridge, UK: Babraham Institute 2011.
14. Martin M. Cutadapt removes adapter sequences from high-throughput sequencing reads. *EMBnet journal* 2011: 17(1): pp. 10-12.
15. Krueger F. Trim Galore!: A wrapper tool around Cutadapt and FastQC to consistently apply quality and adapter trimming to FastQ files. 2015.
16. Dobin A, Davis CA, Schlesinger F, *et al.* STAR: ultrafast universal RNA-seq aligner. *Bioinformatics* 2013: 29(1): 15-21.
17. Brunekreef B, Smit J, de Jongste J, *et al.* The prevention and incidence of asthma and mite allergy (PIAMA) birth cohort study: design and first results. *Pediatr Allergy Immunol* 2002: 13(s15): 55-60.
18. Wijga A, Smit HA, Brunekreef B, *et al.* Are children at high familial risk of developing allergy born into a low risk environment? The PIAMA Birth Cohort Study. Prevention and Incidence of Asthma and Mite Allergy. *Clin Exp Allergy* 2001: 31(4): 576-581.
19. Xu CJ, Soderhall C, Bustamante M, *et al.* DNA methylation in childhood asthma: an epigenome-wide meta-analysis. *Lancet Respir Med* 2018: 6(5): 379-388.
20. Aryee MJ, Jaffe AE, Corrada-Bravo H, *et al.* Minfi: a flexible and comprehensive Bioconductor package for the analysis of Infinium DNA methylation microarrays. *Bioinformatics* 2014: 30(10): 1363-1369.
21. Pidsley R, CC YW, Volta M, *et al.* A data-driven approach to preprocessing Illumina 450K methylation array data. *BMC Genomics* 2013: 14: 293.
22. Willer CJ, Li Y, Abecasis GR. METAL: fast and efficient meta-analysis of genomewide association scans. *Bioinformatics* 2010: 26(17): 2190-2191.
23. Yan Q, Brehm J, Pino-Yanes M, *et al.* A meta-analysis of genome-wide association studies of asthma in Puerto Ricans. *Eur Respir J* 2017: 49(5).



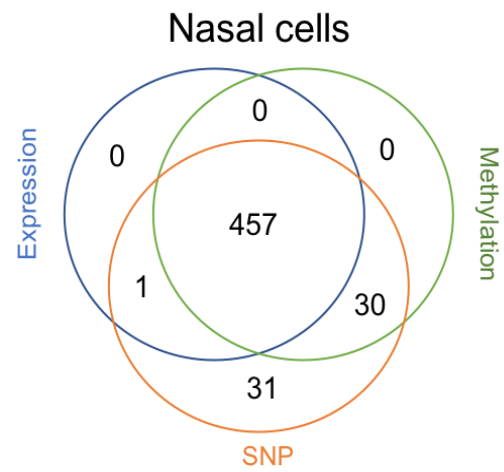

**Supplementary Figure S1** – The omics data distribution from the EVA-PR cohort  
Expression and methylation in nasal airway epithelial cells

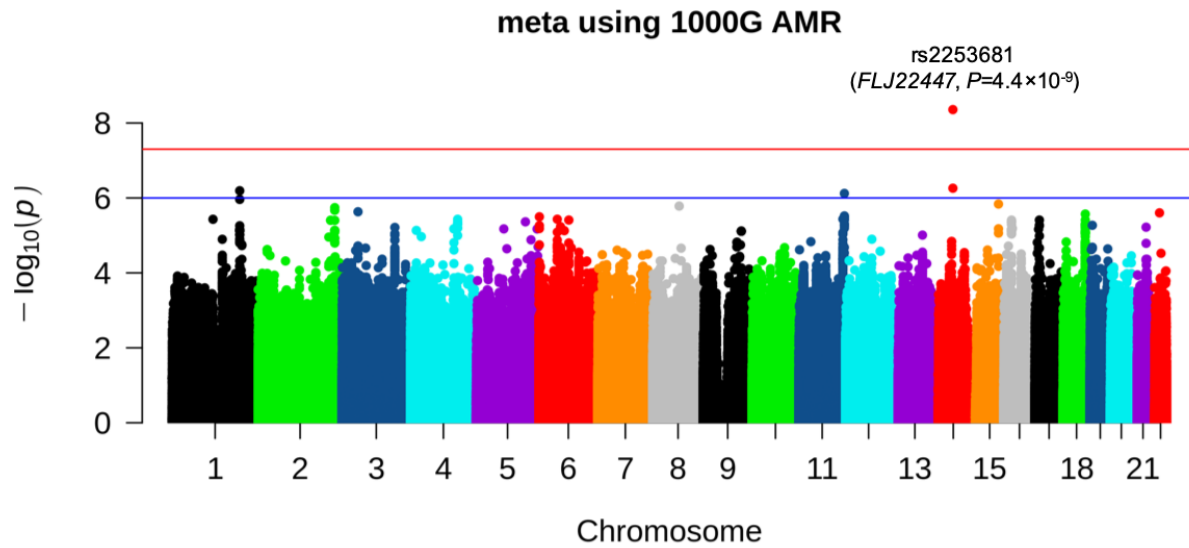

**Supplementary Figure S2 – Manhattan plot of meta-analysis results using 1000 Genome AMR as the imputation reference panel:** Manhattan plot showing the summary meta-analysis results of HPR, GALA II, GACRS, and SCAALA. HPR, GALA II and GACRS were re-imputed using 1000 Genome AMR as the reference panel. SCAALA was not imputed.

**Supplementary Table S1: Meta-analysis of GWAS of asthma exacerbation, for SNPs associated with asthma in two previous meta-analyses of multi-ancestry population and UK Biobank**

| SNP                                                            | CHR: BP         | Alt | Ref | In Cited papers |          | HPR  |      |       | GACRS |      |         | GALA II |      |      | SCAALA |      |      | Meta P | Nearby genes                                                                          |
|----------------------------------------------------------------|-----------------|-----|-----|-----------------|----------|------|------|-------|-------|------|---------|---------|------|------|--------|------|------|--------|---------------------------------------------------------------------------------------|
|                                                                |                 |     |     | OR*             | P#       | AAF  | OR   | P     | AAF   | OR   | P       | AAF     | OR   | P    | AAF    | OR   | P    |        |                                                                                       |
| Loci reported by Demenais, F. et al. Nat Genet 2018; 50: 42-53 |                 |     |     |                 |          |      |      |       |       |      |         |         |      |      |        |      |      |        |                                                                                       |
| rs7705042                                                      | 5: 141 492 419  | C   | A   | 0.92            | 7.90E-09 | 0.31 | 1.18 | 0.22  | 0.33  | 0.98 | 0.89    | 0.31    | 1.02 | 0.79 | NA     | NA   | NA   | 0.51   | NDFIP1,GNDPA1,SPRY4                                                                   |
| rs1233578                                                      | 6: 28 712 247   | G   | A   | 1.09            | 5.90E-07 | 0.24 | 0.94 | 0.69  | 0.15  | 0.99 | 0.95    | 0.19    | 1.13 | 0.18 | 0.30   | 0.81 | 0.30 | 0.38   | GPX5,TRIM27                                                                           |
| rs2325291                                                      | 6: 90 986 686   | A   | G   | 0.91            | 2.20E-12 | 0.24 | 0.96 | 0.78  | 0.25  | 1.09 | 0.53    | 0.26    | 1.06 | 0.41 | NA     | NA   | NA   | 0.42   | BACH2,GJA10,MAP3K7                                                                    |
| rs167769                                                       | 12: 57 503 775  | T   | C   | 1.08            | 3.90E-09 | 0.33 | 1.02 | 0.87  | 0.40  | 0.96 | 0.72    | 0.39    | 1.04 | 0.62 | NA     | NA   | NA   | 0.75   | STAT6,NAB2,LRP1                                                                       |
| rs17637472                                                     | 17: 47 461 433  | A   | G   | 1.08            | 6.60E-09 | 0.29 | 0.86 | 0.30  | 0.25  | 1.08 | 0.60    | 0.23    | 1.05 | 0.57 | NA     | NA   | NA   | 0.83   | ZNF652,PHB                                                                            |
| rs2855812                                                      | 6: 31 472 720   | T   | G   | 1.10            | 8.90E-12 | 0.19 | 1.08 | 0.63  | 0.12  | 1.02 | 0.91    | 0.17    | 1    | 1.00 | 0.18   | 0.83 | 0.48 | 0.81   | MICB,HCP5,MCCD1                                                                       |
| rs2589561                                                      | 10: 9 046 645   | A   | G   | 1.10            | 3.50E-09 | 0.13 | 1.02 | 0.92  | 0.11  | 1.14 | 0.52    | 0.12    | 1.13 | 0.26 | 0.18   | 1.17 | 0.48 | 0.23   | GATA3,CELF2                                                                           |
| rs12543811                                                     | 8: 81 278 885   | G   | A   | 1.09            | 1.10E-10 | 0.42 | 1.01 | 0.96  | 0.45  | 1.05 | 0.68    | 0.47    | 1.13 | 0.07 | NA     | NA   | NA   | 0.10   | TPD52,ZBTB10                                                                          |
| rs17806299                                                     | 16: 11 199 980  | A   | G   | 0.91            | 2.70E-10 | 0.16 | 0.74 | 0.09  | 0.16  | 0.98 | 0.91    | 0.12    | 1.03 | 0.79 | 0.08   | 0.95 | 0.87 | 0.57   | CLEC16A,DEXI,SOCS1                                                                    |
| rs1420101                                                      | 2: 102 957 716  | T   | C   | 1.12            | 3.90E-21 | 0.33 | 1.15 | 0.31  | 0.31  | 1.17 | 0.24    | 0.30    | 1.04 | 0.57 | 0.35   | 1.27 | 0.24 | 0.17   | IL1RL1,IL1RL2,IL18R1                                                                  |
| rs10455025                                                     | 5: 110 404 999  | C   | A   | 1.15            | 9.40E-26 | 0.28 | 0.98 | 0.90  | 0.32  | 1.09 | 0.51    | 0.26    | 1.06 | 0.46 | 0.18   | 1.29 | 0.30 | 0.40   | SLC25A46,TSLP                                                                         |
| rs20541                                                        | 5: 131 995 964  | A   | G   | 1.12            | 5.00E-16 | 0.23 | 0.92 | 0.58  | 0.31  | 0.85 | 0.23    | 0.36    | 1    | 0.98 | 0.20   | 1.24 | 0.33 | 0.47   | IL13,RAD50,IL4                                                                        |
| rs9272346                                                      | 6: 32 604 372   | G   | A   | 0.86            | 5.70E-24 | 0.39 | 1.02 | 0.89  | 0.37  | 0.94 | 0.62    | 0.33    | 0.91 | 0.19 | NA     | NA   | NA   | 0.23   | HLA-DRB1,HLA-DQA1                                                                     |
| rs992969                                                       | 9: 6 209 697    | A   | G   | 0.86            | 7.20E-20 | 0.28 | 1.00 | 0.99  | 0.22  | 1.12 | 0.44    | 0.24    | 0.99 | 0.92 | 0.31   | 0.84 | 0.40 | 0.81   | RANBP6,IL33                                                                           |
| rs7927894                                                      | 11: 76 301 316  | T   | C   | 1.10            | 2.20E-14 | 0.37 | 0.79 | 0.08  | 0.30  | 1.30 | 0.06    | 0.29    | 1    | 0.96 | NA     | NA   | NA   | 0.99   | EMSY,LRRC32                                                                           |
| rs11071558                                                     | 15: 61 069 421  | G   | A   | 0.89            | 1.30E-09 | 0.23 | 1.07 | 0.64  | NA    | NA   | NA      | 0.18    | 1.06 | 0.51 | NA     | NA   | NA   | 0.42   | RORA,NARG2,VPS13C                                                                     |
| rs2033784                                                      | 15: 67 449 660  | G   | A   | 1.10            | 7.40E-15 | 0.37 | 0.98 | 0.87  | 0.39  | 0.58 | 1.19E-5 | 0.37    | 1    | 0.97 | 0.39   | 0.99 | 0.96 | 0.05   | SMAD3,SMAD6,AAGAB                                                                     |
| rs2952156                                                      | 17: 37 876 835  | A   | G   | 1.15            | 2.20E-30 | 0.45 | 1.23 | 0.09  | 0.52  | 1.02 | 0.85    | 0.44    | 1.02 | 0.78 | 0.42   | 1.28 | 0.17 | 0.32   | ERBB2,PGAP3,MIEN1                                                                     |
| Loci reported by Zhu, Z. et al. Nat Genet 2018; 50: 857-864    |                 |     |     |                 |          |      |      |       |       |      |         |         |      |      |        |      |      |        |                                                                                       |
| rs7936070                                                      | 11: 76 293 527  | T   | G   | 1.08            | 2.81E-28 | 0.47 | 0.92 | 0.53  | 0.42  | 1.23 | 0.09    | 0.45    | 1    | 0.98 | NA     | NA   | NA   | 0.64   | C11orf30,LOC100506127,PRKRIR                                                          |
| rs72823641                                                     | 2: 102 936 159  | A   | T   | 0.89            | 1.58E-27 | 0.11 | 0.79 | 0.27  | 0.08  | 0.94 | 0.77    | 0.08    | 1.1  | 0.45 | NA     | NA   | NA   | 0.98   | IL1R1,IL1RL1,IL1RL2,IL18R1,IL18RAP,MIR4772,SLC9A2,SLC9A4                              |
| rs56062135                                                     | 15: 67 455 630  | T   | C   | 1.16            | 1.56E-22 | 0.18 | 1.20 | 0.26  | 0.18  | 0.61 | 0.0005  | 0.15    | 1.21 | 0.04 | 0.11   | 1.16 | 0.62 | 0.58   | SMAD3                                                                                 |
| rs36045143                                                     | 16: 11 224 966  | G   | A   | 0.93            | 1.83E-21 | 0.20 | 0.82 | 0.20  | 0.18  | 0.93 | 0.62    | 0.16    | 0.96 | 0.67 |        |      |      | 0.27   | CLEC16A,DEXI                                                                          |
| rs1837253                                                      | 5: 110 401 872  | T   | C   | 0.93            | 4.38E-21 | 0.23 | 0.90 | 0.50  | 0.23  | 0.99 | 0.96    | 0.27    | 0.89 | 0.14 | 0.24   | 0.90 | 0.62 | 0.13   | TSLP                                                                                  |
| rs7705653                                                      | 5: 110 142 816  | G   | A   | 1.14            | 1.12E-19 | 0.26 | 0.83 | 0.19  | 0.21  | 1.16 | 0.34    | 0.25    | 0.92 | 0.33 | NA     | NA   | NA   | 0.34   | SLC25A46,TMEM232                                                                      |
| rs28393318                                                     | 4: 38 784 267   | G   | A   | 0.92            | 2.14E-19 | 0.39 | 0.88 | 0.32  | 0.25  | 1.00 | 0.98    | 0.28    | 1    | 0.95 | NA     | NA   | NA   | 0.69   | FAM114A1,MIR574,TLR1,TLR6,TLR10                                                       |
| rs869402                                                       | 17: 38 068 043  | T   | C   | 0.89            | 4.15E-17 | 0.29 | 0.66 | 0.003 | 0.34  | 1.01 | 0.96    | 0.31    | 0.96 | 0.59 | NA     | NA   | NA   | 0.11   | ERBB2,GRB7,GSDMA,GSDMB,IKZF3,LRRC3C,MIEN1,MIR4728,ORMDL3,PGAP3,PNMT,STARD3,TCAP,ZPBP2 |
| rs34290285                                                     | 2: 242 698 640  | A   | G   | 0.93            | 5.17E-17 | 0.26 | 1.16 | 0.33  | NA    | NA   | NA      | 0.21    | 0.92 | 0.30 | NA     | NA   | NA   | 0.66   | D2HGDH,GAL3ST2                                                                        |
| rs10174949                                                     | 2: 8 442 248    | A   | G   | 0.94            | 1.70E-16 | 0.24 | 1.11 | 0.46  | 0.23  | 0.89 | 0.41    | 0.26    | 0.93 | 0.37 | NA     | NA   | NA   | 0.44   | LINC00299                                                                             |
| rs9911533                                                      | 17: 3 877 5476  | C   | T   | 0.92            | 9.70E-16 | 0.33 | 1.09 | 0.55  | 0.35  | 1.11 | 0.42    | 0.31    | 0.95 | 0.52 | NA     | NA   | NA   | 0.94   | KRT24,KRT222,SMARCE1                                                                  |
| rs12413578                                                     | 10: 9 049 253   | T   | C   | 0.91            | 1.09E-14 | 0.10 | 0.72 | 0.15  | 0.10  | 0.99 | 0.96    | 0.07    | 1.02 | 0.88 | NA     | NA   | NA   | 0.58   | HV745896                                                                              |
| rs6881270                                                      | 5: 35 879 095   | T   | C   | 0.91            | 1.53E-14 | 0.18 | 0.97 | 0.87  | 0.17  | 0.93 | 0.63    | 0.18    | 1.05 | 0.58 | NA     | NA   | NA   | 0.85   | CAPSL,IL7R,LOC100506406,SPEF2,UGT3A1                                                  |
| rs10876864                                                     | 12: 56 401 085  | G   | A   | 1.05            | 1.41E-13 | 0.50 | 0.96 | 0.73  | 0.33  | 1.25 | 0.09    | 0.37    | 1.07 | 0.37 | 0.60   | 0.95 | 0.77 | 0.20   | CDK2,ERBB3,IKZF4,PA2G4,RAB5B,RPL41,RPS26,SUOX,ZC3H10                                  |
| rs1059513                                                      | 12: 57 489 709  | C   | T   | 0.92            | 7.65E-13 | 0.11 | 0.98 | 0.93  | 0.08  | 1.06 | 0.79    | 0.09    | 1.16 | 0.23 | 0.10   | 0.72 | 0.27 | 0.30   | GPR182,MYO1A,NAB2,RDH16,SDR9C7,STAT6,TAC3,TMEM194A,ZBTB39                             |
| rs56267605                                                     | 4: 123 363 109  | C   | A   | 1.05            | 2.56E-12 | 0.30 | 1.02 | 0.90  | 0.44  | 0.89 | 0.33    | 0.37    | 0.94 | 0.42 | NA     | NA   | NA   | 0.31   | ADAD1,IL2,IL21,IL21-AS1,KIAA1109                                                      |
| rs61839660                                                     | 10: 6 094 697   | T   | C   | 1.12            | 2.30E-11 | 0.05 | 1.13 | 0.67  | NA    | NA   | NA      | NA      | NA   | NA   | NA     | NA   | NA   | 0.67   | IL2RA,RBM17                                                                           |
| rs2706362                                                      | 5: 131 925 187  | C   | T   | 1.06            | 3.75E-11 | 0.32 | 0.95 | 0.73  | 0.19  | 1.19 | 0.27    | 0.26    | 1.04 | 0.60 | NA     | NA   | NA   | 0.49   | IL13,RAD50                                                                            |
| rs1214598                                                      | 1: 167 426 424  | A   | G   | 0.95            | 5.14E-11 | 0.28 | 1.26 | 0.10  | 0.27  | 1.06 | 0.65    | 0.25    | 1.05 | 0.52 | NA     | NA   | NA   | 0.16   | CD247                                                                                 |
| rs659529                                                       | 11: 11 143 6896 | T   | A   | 0.95            | 6.03E-11 | 0.42 | 1.13 | 0.36  | 0.27  | 1.12 | 0.40    | 0.31    | 1.06 | 0.43 | NA     | NA   | NA   | 0.17   | ALG9,BTG4,C11orf1,C11orf88,FDXACB1,LAYN,MIR34B,MIR34C,PPP2R1B,SIK2                    |
| rs2766664                                                      | 20: 52 171 241  | A   | G   | 1.08            | 8.07E-11 | 0.20 | 0.94 | 0.68  | 0.23  | 1.03 | 0.85    | 0.22    | 0.83 | 0.02 | 0.26   | 0.92 | 0.71 | 0.05   | LOC101927770,ZNF217                                                                   |
| rs2169282                                                      | 9: 6 350 235    | A   | G   | 1.09            | 1.80E-10 | 0.49 | 0.97 | 0.80  | 0.40  | 1.13 | 0.34    | 0.41    | 1    | 0.97 | NA     | NA   | NA   | 0.80   | GLDC,UHRF2                                                                            |
| rs10414065                                                     | 19: 33 721 455  | T   | C   | 0.91            | 2.63E-10 | 0.05 | 0.96 | 0.90  | NA    | NA   | NA      | NA      | NA   | NA   | NA     | NA   | NA   | 0.90   | SLC7A10                                                                               |
| rs6461503                                                      | 7: 20 560 996   | C   | T   | 0.95            | 3.19E-10 | 0.49 | 0.99 | 0.93  | 0.37  | 0.91 | 0.45    | 0.44    | 1.02 | 0.80 | 0.61   | 0.77 | 0.14 | 0.89   | ITGB8                                                                                 |

Ref: reference allele; Alt: alternative allele; AAF: alternative allele frequency; OR: odds ratio. Human Genome version: hg19.

\*: This column is odds ratio from multi-ancestry meta-analysis in Demenais, F. et al. Nat Genet 2018; 50: 42-53 and from asthma/allergy meta-analysis in Zhu, Z. et al. Nat Genet 2018; 50: 857-864.

#: This column is P-value from multi-ancestry meta-analysis in Demenais, F. et al. Nat Genet 2018; 50: 42-53 and from asthma/allergy meta-analysis in Zhu, Z. et al. Nat Genet 2018; 50: 857-864.

**Supplementary Table S2: Analysis of association between previously published SNPs for asthma exacerbations or hospitalizations and severe asthma exacerbations in the current meta-analysis of GWAS**

| SNP        | CHR: BP         | Gene          | Alt | Ref | HPR  |      |        | GACRS |      |      | GALA II |      |      | SCAALA |      |      | Meta | Ref |
|------------|-----------------|---------------|-----|-----|------|------|--------|-------|------|------|---------|------|------|--------|------|------|------|-----|
|            |                 |               |     |     | AAF  | OR   | P      | AAF   | OR   | P    | AAF     | OR   | P    | AAF    | OR   | P    | P    |     |
| rs1800925  | 5: 131 992 809  | IL13          | T   | C   | 0.28 | 0.86 | 0.31   | 0.20  | 0.98 | 0.88 | 0.28    | 1.03 | 0.71 | NA     | NA   | NA   | 0.86 | 1   |
| rs1805011  | 16: 27 373 872  | IL4RA         | C   | A   | 0.24 | 1.00 | 1.00   | 0.15  | 0.81 | 0.22 | 0.20    | 1.01 | 0.89 | NA     | NA   | NA   | 0.73 | 2   |
| rs1801275  | 16: 27 374 400  | IL4RA         | G   | A   | 0.37 | 0.91 | 0.50   | 0.29  | 0.91 | 0.46 | 0.35    | 1.05 | 0.50 | 0.51   | 1.02 | 0.92 | 0.99 | 2   |
| rs4950928  | 1: 203 155 882  | CHI3L1        | G   | C   | 0.18 | 0.73 | 0.08   | 0.17  | 0.92 | 0.60 | 0.17    | 1.09 | 0.35 | NA     | NA   | NA   | 0.09 | 3   |
| rs7216389  | 17: 38 069 949  | ORMDL3        | C   | T   | 0.30 | 0.63 | 1.6E-3 | 0.34  | 0.99 | 0.97 | 0.31    | 1.04 | 0.59 | 0.28   | 0.84 | 0.38 | 0.06 | 4   |
| rs6967330  | 7: 105 658 451  | CDHR3         | A   | G   | 0.26 | 1.20 | 0.21   | 0.16  | 1.13 | 0.49 | 0.23    | 1.06 | 0.49 | 0.26   | 0.98 | 0.92 | 0.20 | 5   |
| rs1099729  | 12: 97 251 586  | CTNNA3        | C   | T   | 0.06 | 1.11 | 0.69   | NA    | NA   | NA   | 0.06    | 1.16 | 0.30 | NA     | NA   | NA   | 0.46 | 6   |
| rs9587342  | 13: 107 936 790 | FAM155A       | A   | G   | 0.41 | 0.93 | 0.59   | 0.47  | 0.97 | 0.82 | 0.45    | 0.99 | 0.84 | 0.40   | 1.33 | 0.13 | 0.95 | 7*  |
| rs6426881  | 1: 164 816 726  | PBX1          | T   | C   | 0.11 | 1.20 | 0.36   | 0.12  | 0.99 | 0.96 | 0.13    | 0.94 | 0.55 | 0.09   | 1.06 | 0.86 | 0.92 | 7   |
| rs1074119  | 7: 3 196 333    | CARD11        | T   | C   | 0.44 | 0.99 | 0.92   | 0.41  | 1.07 | 0.58 | 0.44    | 0.95 | 0.48 | NA     | NA   | NA   | 0.44 | 7   |
| rs858928   | 2: 50 892 009   | NRXN1         | A   | C   | 0.18 | 0.96 | 0.80   | 0.15  | 1.28 | 0.18 | 0.18    | 1.03 | 0.77 | NA     | NA   | NA   | 0.51 | 7   |
| rs12201938 | 6: 7 026 562    | RREB1         | A   | G   | 0.09 | 0.82 | 0.40   | 0.08  | 0.64 | 0.03 | 0.08    | 1.09 | 0.52 | 0.05   | 1.09 | 0.83 | 0.52 | 7   |
| rs9325122  | 5:148 202 936   | ADR $\beta$ 2 | C   | T   | 0.28 | 0.98 | 0.92   | 0.23  | 1.07 | 0.66 | 0.22    | 0.92 | 0.32 | NA     | NA   | NA   | 0.51 | 8   |
| rs1432622  | 5:148203762     | ADR $\beta$ 2 | T   | C   | 0.37 | 1.09 | 0.53   | 0.26  | 1.09 | 0.54 | 0.30    | 0.92 | 0.26 | NA     | NA   | NA   | 0.70 | 8   |
| rs1432623  | 5:148204008     | ADR $\beta$ 2 | C   | T   | 0.37 | 1.09 | 0.53   | 0.26  | 1.09 | 0.54 | 0.30    | 0.92 | 0.26 | NA     | NA   | NA   | 0.70 | 8   |
| rs11168068 | 5:148204121     | ADR $\beta$ 2 | C   | T   | 0.37 | 1.09 | 0.53   | 0.26  | 1.09 | 0.54 | 0.30    | 0.92 | 0.26 | NA     | NA   | NA   | 0.70 | 8   |
| rs17778257 | 5:148204577     | ADR $\beta$ 2 | T   | A   | 0.37 | 1.18 | 0.20   | 0.42  | 1.05 | 0.70 | 0.37    | 1.03 | 0.66 | NA     | NA   | NA   | 0.29 | 8   |
| rs2400706  | 5:148204864     | ADR $\beta$ 2 | T   | C   | 0.26 | 0.72 | 0.03   | 0.31  | 0.88 | 0.32 | 0.32    | 1.04 | 0.55 | NA     | NA   | NA   | 0.43 | 8   |
| rs2895795  | 5:148204966     | ADR $\beta$ 2 | A   | T   | 0.26 | 0.72 | 0.03   | 0.31  | 0.88 | 0.32 | 0.33    | 1.05 | 0.54 | NA     | NA   | NA   | 0.45 | 8   |
| rs2400707  | 5:148205052     | ADR $\beta$ 2 | A   | G   | 0.37 | 1.10 | 0.49   | 0.26  | 1.09 | 0.54 | 0.29    | 0.92 | 0.27 | NA     | NA   | NA   | 0.73 | 8   |
| rs2053044  | 5:148205372     | ADR $\beta$ 2 | A   | G   | 0.37 | 1.10 | 0.49   | 0.26  | 1.09 | 0.52 | 0.29    | 0.92 | 0.25 | NA     | NA   | NA   | 0.71 | 8   |
| rs12654778 | 5:148205741     | ADR $\beta$ 2 | A   | G   | 0.37 | 1.18 | 0.20   | 0.42  | 1.04 | 0.72 | 0.37    | 1.02 | 0.74 | 0.31   | 0.65 | 0.02 | 0.75 | 8   |
| rs11168070 | 5:148205927     | ADR $\beta$ 2 | G   | C   | 0.28 | 0.98 | 0.89   | 0.23  | 1.06 | 0.70 | 0.22    | 0.92 | 0.30 | NA     | NA   | NA   | 0.47 | 8   |
| rs11959427 | 5:148206028     | ADR $\beta$ 2 | C   | T   | 0.29 | 0.97 | 0.86   | 0.23  | 1.06 | 0.70 | 0.22    | 0.92 | 0.30 | NA     | NA   | NA   | 0.46 | 8   |
| rs1801704  | 5:148206375     | ADR $\beta$ 2 | C   | T   | 0.29 | 0.98 | 0.90   | 0.23  | 1.04 | 0.78 | 0.22    | 0.92 | 0.27 | 0.23   | 1.17 | 0.45 | 0.56 | 8   |
| rs1042713  | 5:148206440     | ADR $\beta$ 2 | A   | G   | 0.45 | 1.29 | 0.05   | 0.46  | 1.07 | 0.58 | 0.44    | 1.01 | 0.92 | 0.46   | 0.89 | 0.52 | 0.36 | 8   |
| rs1042714  | 5:148206473     | ADR $\beta$ 2 | G   | C   | 0.29 | 0.97 | 0.86   | 0.23  | 1.04 | 0.78 | 0.22    | 0.92 | 0.27 | 0.23   | 1.16 | 0.48 | 0.53 | 8   |
| rs1042717  | 5:148206646     | ADR $\beta$ 2 | A   | G   | 0.26 | 0.70 | 0.02   | 0.31  | 0.90 | 0.39 | 0.33    | 1.06 | 0.43 | 0.31   | 0.97 | 0.89 | 0.54 | 8   |
| rs1042718  | 5:148206917     | ADR $\beta$ 2 | A   | C   | 0.24 | 0.67 | 0.01   | 0.28  | 0.88 | 0.36 | 0.31    | 1.12 | 0.13 | 0.29   | 1.01 | 0.97 | 0.91 | 8   |
| rs1042720  | 5:148207633     | ADR $\beta$ 2 | A   | G   | 0.43 | 0.79 | 0.06   | NA    | NA   | NA   | 0.46    | 1.00 | 0.98 | 0.46   | 1.25 | 0.22 | 0.69 | 8   |

Ref: reference allele; Alt: alternative allele; AAF: alternative allele frequency; OR: odds ratio. Human Genome version: hg19.

\* Top 5 out of 160 SNPs used in asthma exacerbations prediction in 7 are shown.

1. Hunninghake GM, Soto-Quiros ME, Avila L, Su J, Murphy A, Demeo DL, et al. Polymorphisms in IL13, total IgE, eosinophilia, and asthma exacerbations in childhood. *J Allergy Clin Immunol* 2007; 120:84-90.
2. Wenzel SE, Balzar S, Ampleford E, Hawkins GA, Busse WW, Calhoun WJ, et al. IL4R alpha mutations are associated with asthma exacerbations and mast cell/IgE expression. *Am J Respir Crit Care Med* 2007; 175:570-6.
3. Cunningham J, Basu K, Tavendale R, Palmer CN, Smith H, Mukhopadhyay S. The CHI3L1 rs4950928 polymorphism is associated with asthma-related hospital admissions in children and young adults. *Ann Allergy Asthma Immunol* 2011; 106:381-6.
4. Bisgaard H, Bonnelykke K, Sleiman PM, Brasholt M, Chawes B, Kreiner-Moller E, et al. Chromosome 17q21 gene variants are associated with asthma and exacerbations but not atopy in early childhood. *Am J Respir Crit Care Med* 2009; 179:179-85.
5. Bonnelykke K, Sleiman P, Nielsen K, Kreiner-Moller E, Mercader JM, Belgrave D, et al. A genome-wide association study identifies CDHR3 as a susceptibility locus for early childhood asthma with severe exacerbations. *Nat Genet* 2014; 46:51-5.
6. McGeachie MJ, Wu AC, Tse SM, Clemmer GL, Sordillo J, Himes BE, et al. CTNNA3 and SEMA3D: Promising loci for asthma exacerbation identified through multiple genome-wide association studies. *J Allergy Clin Immunol* 2015; 136:1503-10.
7. Xu M, Tantisira KG, Wu A, Litonjua AA, Chu JH, Himes BE, et al. Genome Wide Association Study to predict severe asthma exacerbations in children using random forests classifiers. *BMC Med Genet* 2011; 12:90.
8. Hawkins GA, Tantisira K, Meyers DA, Ampleford EJ, Moore WC, Klanderman B, et al. Sequence, Haplotype, and Association Analysis of ADRB2 in a Multiethnic Asthma Case-Control Study. *Am J Respir Crit Care Med* 2006; 174:1101-9.

**Supplementary Table S3: Top 20 eQTLs for rs2253681 in EVA-PR nasal epithelial cells and replication results from PIAMA**

| Gene                | Chr | Start       | End         | EVA-PR  |                       |      | PIAMA   |                       | Meta-analysis |                       |
|---------------------|-----|-------------|-------------|---------|-----------------------|------|---------|-----------------------|---------------|-----------------------|
|                     |     |             |             | Effect  | P-value               | FDR* | Effect  | P-value               | Effect        | P-value               |
| <i>SRF</i>          | 6   | 43 139 032  | 43 149 244  | -0.0723 | 5.84×10 <sup>-4</sup> | 1.00 | -0.0921 | 8.26×10 <sup>-3</sup> | -0.0776       | 1.64×10 <sup>-5</sup> |
| <i>OR2A20P</i>      | 7   | 143 947 766 | 143 948 696 | -0.1858 | 6.27×10 <sup>-4</sup> | 1.00 | NA      | NA                    | NA            | NA                    |
| <i>RASIP1</i>       | 19  | 49 223 841  | 49 243 970  | -0.1083 | 9.93×10 <sup>-4</sup> | 1.00 | -0.1064 | 1.40×10 <sup>-1</sup> | -0.1080       | 3.08×10 <sup>-4</sup> |
| <i>LOC100128398</i> | 19  | 58 514 261  | 58 518 574  | -0.0845 | 1.56×10 <sup>-3</sup> | 1.00 | NA      | NA                    | NA            | NA                    |
| <i>SNORA53</i>      | 12  | 98 993 412  | 98 993 662  | 0.2324  | 1.56×10 <sup>-3</sup> | 1.00 | NA      | NA                    | NA            | NA                    |
| <i>HPGDS</i>        | 4   | 95 219 706  | 95 264 027  | 0.1359  | 2.14×10 <sup>-3</sup> | 1.00 | 0.0868  | 7.27×10 <sup>-1</sup> | 0.1344        | 2.05×10 <sup>-3</sup> |
| <i>NPTXR</i>        | 22  | 39 214 455  | 39 240 017  | -0.0864 | 2.41×10 <sup>-3</sup> | 1.00 | -0.1737 | 5.39×10 <sup>-2</sup> | -0.0943       | 5.13×10 <sup>-4</sup> |
| <i>ASCC1</i>        | 10  | 73 855 789  | 73 975 867  | 0.0352  | 2.42×10 <sup>-3</sup> | 1.00 | 0.0562  | 1.44×10 <sup>-1</sup> | 0.0369        | 8.83×10 <sup>-4</sup> |
| <i>SOX4</i>         | 6   | 21 593 971  | 21 598 849  | -0.0840 | 2.59×10 <sup>-3</sup> | 1.00 | -0.0367 | 3.78×10 <sup>-1</sup> | -0.0694       | 2.76×10 <sup>-3</sup> |
| <i>ZNF675</i>       | 19  | 23 835 707  | 23 870 017  | 0.0674  | 2.82×10 <sup>-3</sup> | 1.00 | -0.0524 | 4.63×10 <sup>-1</sup> | 0.0565        | 8.62×10 <sup>-3</sup> |
| <i>PPIP5K1</i>      | 15  | 43 825 659  | 43 877 090  | -0.0356 | 2.85×10 <sup>-3</sup> | 1.00 | 0.0207  | 4.89×10 <sup>-1</sup> | -0.0279       | 1.19×10 <sup>-2</sup> |
| <i>TCF7L2</i>       | 10  | 114 710 008 | 114 927 436 | -0.0598 | 3.05×10 <sup>-3</sup> | 1.00 | -0.0266 | 4.01×10 <sup>-1</sup> | -0.0502       | 3.19×10 <sup>-3</sup> |
| <i>SSR4P1</i>       | 21  | 46 490 869  | 46 493 126  | 0.0693  | 3.27×10 <sup>-3</sup> | 1.00 | 0.0078  | 9.56×10 <sup>-1</sup> | 0.0676        | 3.63×10 <sup>-3</sup> |
| <i>SNORD17</i>      | 20  | 17 943 352  | 17 943 589  | 0.1407  | 3.34×10 <sup>-3</sup> | 1.00 | NA      | NA                    | NA            | NA                    |
| <i>LOC100130691</i> | 2   | 178 148 235 | 178 257 419 | 0.0726  | 3.41×10 <sup>-3</sup> | 1.00 | NA      | NA                    | NA            | NA                    |
| <i>TNNI3</i>        | 19  | 55 663 135  | 55 669 100  | -0.1318 | 3.49×10 <sup>-3</sup> | 1.00 | NA      | NA                    | NA            | NA                    |
| <i>ARHGEF5</i>      | 7   | 144 052 488 | 144 077 725 | -0.0946 | 3.61×10 <sup>-3</sup> | 1.00 | -0.0399 | 3.49×10 <sup>-1</sup> | -0.0745       | 3.94×10 <sup>-3</sup> |
| <i>LOC100132077</i> | 9   | 97 094 757  | 97 123 230  | 0.1005  | 4.04×10 <sup>-3</sup> | 1.00 | NA      | NA                    | NA            | NA                    |
| <i>HACE1</i>        | 6   | 105 175 967 | 105 307 794 | 0.0405  | 4.08×10 <sup>-3</sup> | 1.00 | 0.0634  | 1.92×10 <sup>-1</sup> | 0.0423        | 1.79×10 <sup>-3</sup> |
| <i>NDUFS6</i>       | 5   | 1 801 495   | 1 816 167   | -0.0441 | 4.12×10 <sup>-3</sup> | 1.00 | 0.0262  | 5.71×10 <sup>-1</sup> | -0.0371       | 1.09×10 <sup>-2</sup> |

\* FDR is adjusted for the whole genome in EVA-PR

**Supplementary Table S4: Nominally significant pathways associated with severe asthma exacerbations with genes in the *FLJ22447* locus**

| Gene*  | Pathway                                                                        | P-value |
|--------|--------------------------------------------------------------------------------|---------|
| PRKCH  | REACTOME_SIGNALING_BY_GPCR                                                     | 0.0084  |
| PRKCH  | REACTOME_PLATELET_ACTIVATION_SIGNALING_AND_AGGREGATION                         | 0.0168  |
| PRKCH  | REACTOME_GPCR_DOWNSTREAM_SIGNALING                                             | 0.0315  |
| PRKCH  | GO_REGULATION_OF_IMMUNE_SYSTEM_PROCESS                                         | 0.0004  |
| PRKCH  | GO_REGULATION_OF_EPITHELIAL_CELL_DIFFERENTIATION                               | 0.0024  |
| PRKCH  | GO_REGULATION_OF_CELL_PROLIFERATION                                            | 0.0035  |
| PRKCH  | GO_POSITIVE_REGULATION_OF_CELL_PROLIFERATION                                   | 0.0055  |
| PRKCH  | GO_PROTEIN_PHOSPHORYLATION                                                     | 0.0153  |
| PRKCH  | GO_ENZYME_BINDING                                                              | 0.0158  |
| PRKCH  | GO_POSITIVE_REGULATION_OF_GLIOGENESIS                                          | 0.0193  |
| PRKCH  | GO_REGULATION_OF_MULTICELLULAR_ORGANISMAL_DEVELOPMENT                          | 0.0205  |
| PRKCH  | GO_POSITIVE_REGULATION_OF_EPITHELIAL_CELL_DIFFERENTIATION                      | 0.0209  |
| PRKCH  | GO_PLATELET_ACTIVATION                                                         | 0.0255  |
| PRKCH  | GO_POSITIVE_REGULATION_OF_DEVELOPMENTAL_PROCESS                                | 0.0303  |
| PRKCH  | GO_POSITIVE_REGULATION_OF_CELL_DIFFERENTIATION                                 | 0.0340  |
| PRKCH  | GO_POSITIVE_REGULATION_OF_EPIDERMAL_CELL_DIFFERENTIATION                       | 0.0384  |
| PRKCH  | GO_RAL_GTPASE_BINDING                                                          | 0.0398  |
| PRKCH  | GO_REGULATION_OF_CELL_DIFFERENTIATION                                          | 0.0444  |
| PRKCH  | GO_TRANSFERASE_ACTIVITY_TRANSFERRING_PHOSPHORUS_CONTAINING_GROUPS              | 0.0448  |
| PRKCH  | GO_POSITIVE_REGULATION_OF_IMMUNE_SYSTEM_PROCESS                                | 0.0460  |
| PRKCH  | GO_ADENYL_NUCLEOTIDE_BINDING                                                   | 0.0483  |
| SNAPC1 | GO_NUCLEAR_TRANSCRIPTION_FACTOR_COMPLEX                                        | 0.0028  |
| SNAPC2 | GO_TRANSCRIPTION_FACTOR_COMPLEX                                                | 0.0295  |
| HIF1A  | KEGG_MTOR_SIGNALING_PATHWAY                                                    | 0.0341  |
| HIF1A  | GO_REGULATION_OF_IMMUNE_SYSTEM_PROCESS                                         | 0.0004  |
| HIF1A  | GO_REGULATION_OF_HEMOPOIESIS                                                   | 0.0005  |
| HIF1A  | GO_COLUMNAR_CUBOIDAL_EPITHELIAL_CELL_DEVELOPMENT                               | 0.0011  |
| HIF1A  | GO_CELLULAR_COMPONENT_MORPHOGENESIS                                            | 0.0012  |
| HIF1A  | GO_CELLULAR_RESPONSE_TO_INTERLEUKIN_1                                          | 0.0016  |
| HIF1A  | GO_ESTABLISHMENT_OF_LOCALIZATION_BY_MOVEMENT_ALONG_MICROTUBULE                 | 0.0020  |
| HIF1A  | GO_RESPONSE_TO_INTERLEUKIN_1                                                   | 0.0028  |
| HIF1A  | GO_NUCLEAR_TRANSCRIPTION_FACTOR_COMPLEX                                        | 0.0028  |
| HIF1A  | GO_CELL_DEVELOPMENT                                                            | 0.0029  |
| HIF1A  | GO_REGULATION_OF_CELL_PROLIFERATION                                            | 0.0035  |
| HIF1A  | GO_REGULATION_OF_MYELOID_CELL_DIFFERENTIATION                                  | 0.0045  |
| HIF1A  | GO_ORGANELLE_TRANSPORT_ALONG_MICROTUBULE                                       | 0.0054  |
| HIF1A  | GO_POSITIVE_REGULATION_OF_CELL_PROLIFERATION                                   | 0.0055  |
| HIF1A  | GO_CYTOPLASMIC_REGION                                                          | 0.0055  |
| HIF1A  | GO_EPITHELIAL_CELL_DEVELOPMENT                                                 | 0.0068  |
| HIF1A  | GO_CYTOSKELETON_DEPENDENT_INTRACELLULAR_TRANSPORT                              | 0.0079  |
| HIF1A  | GO_EMBRYONIC_HEART_TUBE_MORPHOGENESIS                                          | 0.0085  |
| HIF1A  | GO_CELL_PROJECTION_CYTOPLASM                                                   | 0.0104  |
| HIF1A  | GO_HEART_MORPHOGENESIS                                                         | 0.0108  |
| HIF1A  | GO_UBIQUITIN_LIKE_PROTEIN_LIGASE_BINDING                                       | 0.0117  |
| HIF1A  | GO_MORPHOGENESIS_OF_AN_EPITHELIUM                                              | 0.0127  |
| HIF1A  | GO_POSITIVE_REGULATION_OF_HEMOPOIESIS                                          | 0.0128  |
| HIF1A  | GO_ACUTE_INFLAMMATORY_RESPONSE                                                 | 0.0138  |
| HIF1A  | GO_RECEPTOR_BINDING                                                            | 0.0145  |
| HIF1A  | GO_RNA_POLYMERASE_II_TRANSCRIPTION_FACTOR_COMPLEX                              | 0.0148  |
| HIF1A  | GO_REGULATION_OF_VASCULAR_ENDOTHELIAL_GROWTH_FACTOR_RECEPTOR_SIGNALING_PATHWAY | 0.0154  |
| HIF1A  | GO_ENZYME_BINDING                                                              | 0.0158  |
| HIF1A  | GO_TISSUE_MORPHOGENESIS                                                        | 0.0160  |
| HIF1A  | GO_COLUMNAR_CUBOIDAL_EPITHELIAL_CELL_DIFFERENTIATION                           | 0.0170  |
| HIF1A  | GO_REGULATION_OF_VASCULAR_ENDOTHELIAL_GROWTH_FACTOR_PRODUCTION                 | 0.0177  |
| HIF1A  | GO_AXON_PART                                                                   | 0.0186  |
| HIF1A  | GO_DIGESTIVE_SYSTEM_DEVELOPMENT                                                | 0.0195  |
| HIF1A  | GO_REGULATION_OF_EPITHELIAL_CELL_PROLIFERATION                                 | 0.0196  |
| HIF1A  | GO_AXO_DENDRITIC_TRANSPORT                                                     | 0.0201  |
| HIF1A  | GO_REGULATION_OF_MULTICELLULAR_ORGANISMAL_DEVELOPMENT                          | 0.0205  |
| HIF1A  | GO_REGULATION_OF_TRANSCRIPTION_FROM_RNA_POLYMERASE_II_PROMOTER                 | 0.0217  |
| HIF1A  | GO_POSITIVE_REGULATION_OF_NUCLEOTIDE_METABOLIC_PROCESS                         | 0.0225  |

|       |                                                                                  |        |
|-------|----------------------------------------------------------------------------------|--------|
| HIF1A | GO_NEGATIVE_REGULATION_OF_MULTICELLULAR_ORGANISMAL_PROCESS                       | 0.0227 |
| HIF1A | GO_CELL_MORPHOGENESIS_INVOLVED_IN_DIFFERENTIATION                                | 0.0229 |
| HIF1A | GO_HEART_DEVELOPMENT                                                             | 0.0244 |
| HIF1A | GO_TUBE_MORPHOGENESIS                                                            | 0.0248 |
| HIF1A | GO_POSITIVE_REGULATION_OF_NEUROBLAST_PROLIFERATION                               | 0.0270 |
| HIF1A | GO_EMBRYONIC_HEART_TUBE_DEVELOPMENT                                              | 0.0270 |
| HIF1A | GO_CELLULAR_RESPONSE_TO_OXYGEN_LEVELS                                            | 0.0277 |
| HIF1A | GO_TRANSCRIPTION_FACTOR_COMPLEX                                                  | 0.0295 |
| HIF1A | GO_POSITIVE_REGULATION_OF_DEVELOPMENTAL_PROCESS                                  | 0.0303 |
| HIF1A | GO_CELLULAR_RESPONSE_TO_STRESS                                                   | 0.0321 |
| HIF1A | GO_POSITIVE_REGULATION_OF_CELL_DIFFERENTIATION                                   | 0.0340 |
| HIF1A | GO_DOPAMINERGIC_NEURON_DIFFERENTIATION                                           | 0.0341 |
| HIF1A | GO_STEM_CELL_DIFFERENTIATION                                                     | 0.0381 |
| HIF1A | GO_POSITIVE_REGULATION_OF_TRANSCRIPTION_FROM_RNA_POLYMERASE_II_PROMOTER          | 0.0391 |
| HIF1A | GO_CELLULAR_RESPONSE_TO_CYTOKINE_STIMULUS                                        | 0.0399 |
| HIF1A | GO_AXON                                                                          | 0.0416 |
| HIF1A | GO_OUTFLOW_TRACT_MORPHOGENESIS                                                   | 0.0424 |
| HIF1A | GO_TISSUE_REMODELING                                                             | 0.0432 |
| HIF1A | GO_REGULATION_OF_CELL_DIFFERENTIATION                                            | 0.0444 |
| HIF1A | GO_DEVELOPMENTAL_MATURATION                                                      | 0.0447 |
| HIF1A | GO_POSITIVE_REGULATION_OF_IMMUNE_SYSTEM_PROCESS                                  | 0.0460 |
| HIF1A | GO_REGULATION_OF_SMOOTH_MUSCLE_CELL_PROLIFERATION                                | 0.0467 |
| HIF1A | GO_TRANSCRIPTION_FACTOR_ACTIVITY_RNA_POLYMERASE_II_TRANSCRIPTION_FACTOR_BINDING  | 0.0471 |
| HIF1A | GO_RNA_POLYMERASE_II_TRANSCRIPTION_FACTOR_ACTIVITY_SEQUENCE_SPECIFIC_DNA_BINDING | 0.0480 |

\* The genes (*TMEM30B*, *PRKCH*, *LOC101927780*, *HIF1A-AS1*, *HIF1A-AS2*, *SNAPC1*, *FLJ22447* and *HIF1A*) in *FLJ22447* locus and also included in the nominally significant pathways.



**Supplementary Table S5: Results for SNP rs2253681 (minor allele = A) and severe asthma exacerbations using different imputation reference panels**

| Reference panels | HPR<br>(genotyped) |      |       | GACRS<br>(imputed) |      |      | GALA II <sup>†</sup><br>(genotyped) |      |        | SCAALA <sup>*</sup><br>(genotyped) |      |        | Meta |        |
|------------------|--------------------|------|-------|--------------------|------|------|-------------------------------------|------|--------|------------------------------------|------|--------|------|--------|
|                  | MAF                | OR   | P     | MAF                | OR   | P    | MAF                                 | OR   | P      | MAF                                | OR   | P      | OR   | P      |
| HRC              | 0.20               | 1.49 | 0.013 | 0.11               | 1.38 | 0.12 | 0.16                                | 1.54 | 2.3E-5 | 0.24                               | 1.92 | 3.2E-3 | 1.55 | 6.3E-9 |
| 1000G AMR        | 0.20               | 1.49 | 0.013 | 0.11               | 1.37 | 0.12 | 0.16                                | 1.55 | 1.5E-5 |                                    |      |        | 1.55 | 4.4E-9 |

SNP rs2253681 was genotyped in HPR, GALA II and SCAALA, and only imputed in GACRS.

<sup>†</sup>Although rs2253681 was a genotyped SNP in GALA II, there was one sample with missing genotype. This sample had different imputed genotypes for rs2253681 between HRC and 1000G AMR, which caused the small discrepancy in p-values and ORs.

<sup>\*</sup>SCAALA data were not imputed. Thus, SCAALA results were not affected by reference panels.
